# Supplementary material for: Factors Associated With Outcomes of Patients With Primary Sclerosing Cholangitis and Development and Validation of a Risk Scoring System
Source: PubMed Central journal article supplement — Hepatology. 2019 Mar 4;69(5):2120–35. doi: 10.1002/hep.30479 (PMC6519245; doi:10.1002/hep.30479), 2019-03-04
Supplement: HEP-69-2120-s001.pdf [file HEP-69-2120-s001.pdf]

**Supplementary table 1:** Univariate analysis using un-imputed data and multivariate analysis using 10 imputed data sets, of factors at **diagnosis** associated with **10 year risk** of transplantation or death

| Factor                        | Univariable Analysis |         | Multivariable Analysis |         |
|-------------------------------|----------------------|---------|------------------------|---------|
|                               | HR (95% CI)          | p-value | HR (95% CI)            | p-value |
| Female                        | 0.83 (0.64,1.07)     | 0.157   |                        |         |
| Age at diagnosis              | 1.01 (1.01,1.02)     | 0.001   | 1.02 (1.01,1.03)       | 0.001   |
| Extra-hepatic biliary disease | 1.76 (1.34,2.31)     | <0.001  | 1.45 (1.09,1.92)       | 0.010   |
| IBD presence                  | 0.94 (0.65,1.37)     | 0.766   |                        |         |
| Autoimmune disease            | 1.16 (0.84,1.60)     | 0.353   |                        |         |
| Smoker                        | 1.03 (0.79,1.34)     | 0.846   |                        |         |
| Bilirubin                     |                      |         |                        |         |
| 35 -49                        | 2.92 (1.67,5.11)     | <0.001  | 1.92 (1.07,3.45)       | 0.030   |
| 50+                           | 4.88 (3.52,6.75)     | <0.001  | 2.50 (1.66,3.75)       | 0.000   |
| ALP ratio                     |                      |         |                        |         |
| 1.5 - <2.5                    | 1.15 (0.72,1.82)     |         | 1.15 (0.75,1.78)       | 0.519   |
| 2.5+                          | 2.04 (1.46,2.85)     | <0.001  | 1.70 (1.16,2.50)       | 0.007   |
| ALT                           | 1.02 (1.00,1.03)     | 0.030   |                        |         |
| Albumin                       | 0.92 (0.89,0.94)     | <0.001  | 0.97 (0.94,1.00)       | 0.075   |
| Haemoglobin                   | 0.85 (0.79,0.92)     | <0.001  | 0.99 (0.98,1.00)       | 0.037   |
| Platelets group               |                      |         |                        |         |
| 150 - 199                     | 0.37 (0.21,0.66)     | 0.001   | 0.63 (0.36,1.11)       | 0.106   |
| 200 - 399                     | 0.24 (0.16,0.37)     | <0.001  | 0.40 (0.25,0.63)       | 0.000   |
| 400+                          | 0.24 (0.14,0.41)     | <0.001  | 0.24 (0.13,0.45)       | 0.000   |
| Eosinophils                   | 1.00 (0.82,1.21)     | 0.964   |                        |         |
| Sodium                        | 0.91 (0.87,0.96)     | 0.001   |                        |         |
| Creatinine >120               | 1.75 (0.77,3.96)     | 0.181   |                        |         |
| IgG                           | 1.03 (0.95,1.12)     | 0.478   |                        |         |

IBD; Inflammatory bowel disease, ALP; Alkaline Phosphatase ALT; Alanine Transaminase, IgG; immunoglobulins

**Supplementary Table 2:** Change in mean biochemistry from baseline ( $t_0$ ) to year 2 ( $t_2$ ) for all patients within derivation cohort (positive result indicates increase in value). Values are mean unless otherwise stated.

| Variable    | Change from baseline   | p-value |
|-------------|------------------------|---------|
| ALT         | -43.99 (-52.53,-35.44) | <0.001  |
| Albumin     | 0.39 (-0.09,0.87)      | 0.1102  |
| Bilirubin   | 0.18 (-4.99,5.34)      | 0.9457  |
| Platelets   | -29.86 (-38.98,-20.73) | <0.001  |
| ALP (ratio) | -1.77 (2.01,-1.54)     | <0.001  |

**Supplementary table 3:** Event rates in four groups defined according to long-term risk score in the derivation and validation cohorts

| Risk Group | Score (RS <sub>LT</sub> )                 | Derivation Cohort  |                         | Validation Cohort  |                         |
|------------|-------------------------------------------|--------------------|-------------------------|--------------------|-------------------------|
|            |                                           | No. of individuals | Observed event rate (%) | No. of individuals | Observed event rate (%) |
| 1          | RS <sub>LT</sub> < -2.019879              | 216                | 13 (6.0%)               | 105                | 3 (2.9%)                |
| 2          | -2.019879 < RS <sub>LT</sub> < -1.463874  | 215                | 18 (8.4%)               | 77                 | 8 (10.4%)               |
| 3          | -1.463874 < RS <sub>LT</sub> < -0.8146346 | 215                | 41 (19.1%)              | 60                 | 12 (20.0%)              |
| 4          | -0.8146346 < RS <sub>LT</sub> < 2.737384  | 215                | 120 (55.8%)             | 94                 | 45 (47.9%)              |

**Supplementary table 4:** HLA genotype and association with outcome using a test for trend across 0, 1 and 2 copies of each HLA allele

| Allele              | HR (95% CI)      | p-value |
|---------------------|------------------|---------|
| <i>HLA-B*08:01</i>  | 1.24 (1.05,1.47) | 0.013   |
| <i>HLA-DR*03:01</i> | 1.33 (1.13,1.58) | 0.001   |
| <i>HLA-DR*04:01</i> | 1.03 (0.67,1.57) | 0.903   |
| <i>HLA-DR*07:01</i> | 0.88 (0.63,1.24) | 0.466   |
| <i>HLA-DR*13:01</i> | 0.85 (0.62,1.16) | 0.304   |
| <i>HLA-DR*15:01</i> | 1.23 (0.96,1.58) | 0.096   |

**Supplementary table 5:** Association between HLA-DR\*03:01 genotype and clinical characteristics (standard deviation of continuous variables in brackets)

| No. of alleles | HLA-DR*03:01 |             |             | p-value |
|----------------|--------------|-------------|-------------|---------|
|                | 0            | 1           | 2           |         |
| Age            | 47.6 (15.9)  | 46.6 (13.8) | 40.8 (15.4) | 0.007   |
| Bilirubin      | 28 (57)      | 48 (92)     | 34 (54)     | 0.059   |
| ALP ratio      | 2.6 (1.9)    | 2.8 (2.1)   | 2.8 (2.1)   | 0.612   |
| Albumin        | 40 (6)       | 39 (6)      | 37 (8)      | 0.068   |
| Haemoglobin    | 134 (18)     | 134 (18)    | 129 (14)    | 0.324   |

|                              |           |           |           |       |
|------------------------------|-----------|-----------|-----------|-------|
| Platelet count               | 298 (128) | 298 (141) | 297 (133) | 0.998 |
| Female                       | 35.2      | 32.9      | 40.7      | 0.561 |
| Disease type<br>(EH disease) | 50.1      | 56.6      | 49.1      | 0.404 |

ALP; Alkaline Phosphatase ALT; Alanine Transaminase, IgG; immunoglobulins, EH; extra-hepatic biliary

**Supplementary figure 1:** Cubic splines demonstrating relationship between each variable and log of the relative hazard ratio.

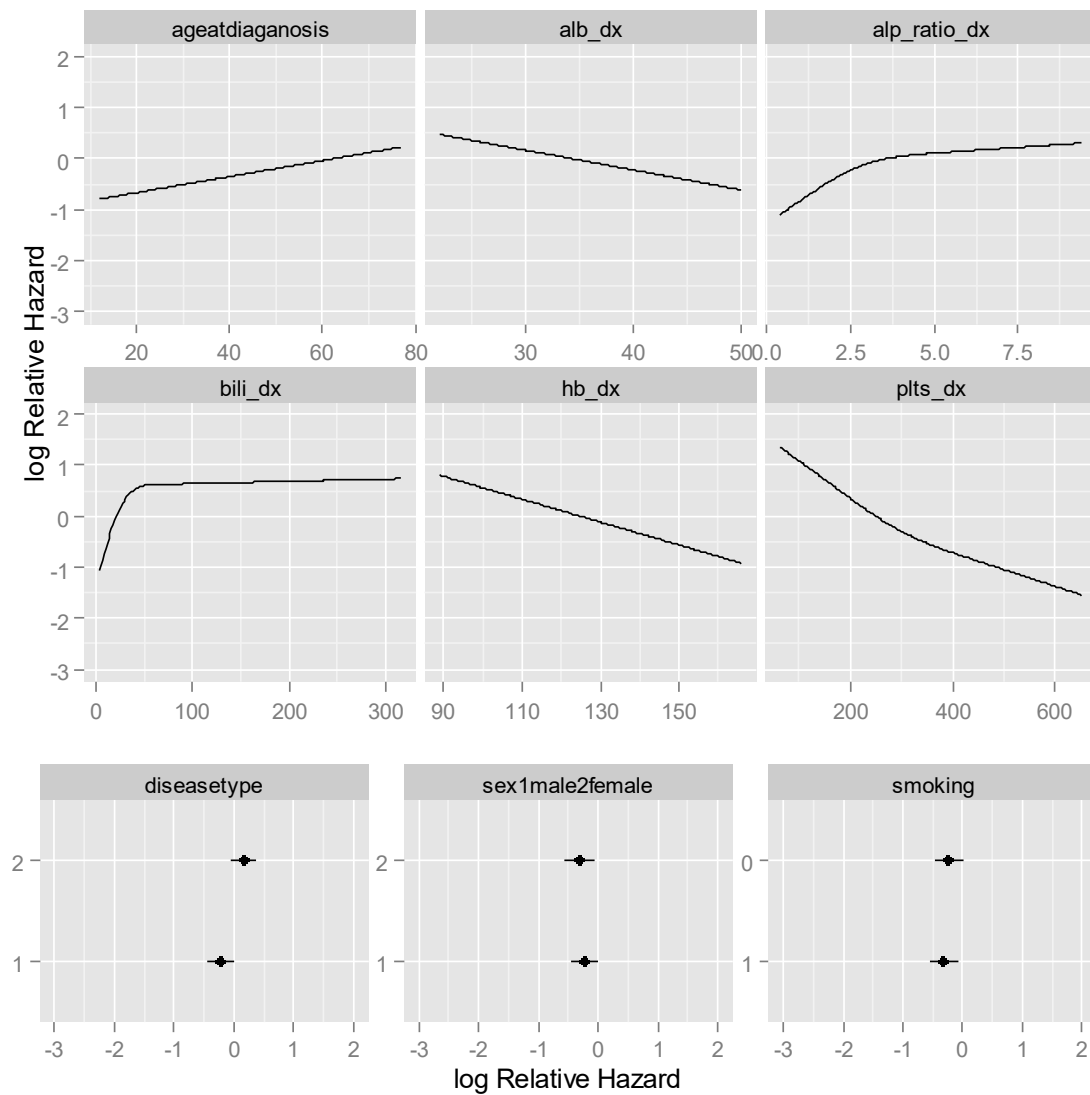

**Supplementary figure 2:** Kaplan-Meier survival curve for presence of extra-hepatic (EH) biliary disease (red line) versus intra-hepatic biliary (IH) or small duct disease (blue line) at diagnosis

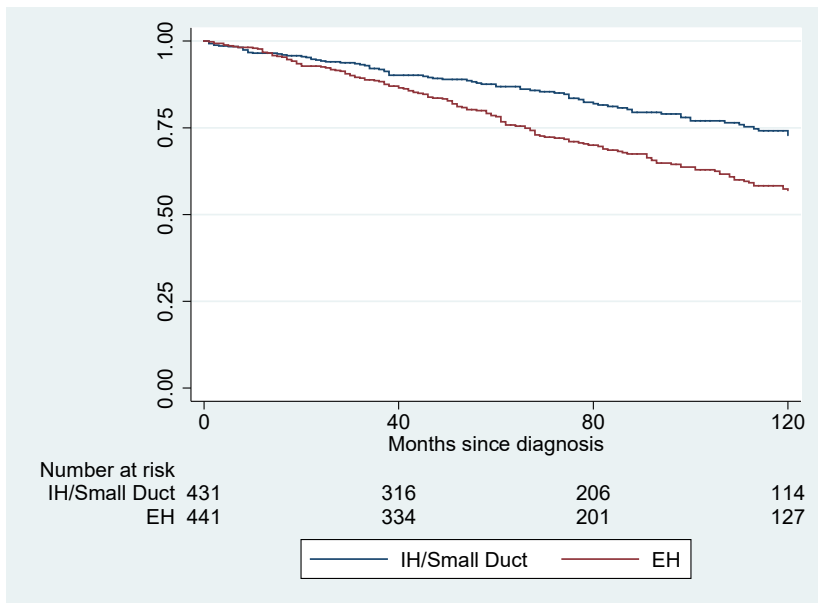

## UK PSC Contributing Authors

Abertawe Bro Morgannwg University NHS Trust (Dr **Chin Lye Ch'ng**, Dr **Clement Lai**, Dr **Tom Yapp**), Aintree University Hospitals NHS Foundation Trust (Dr **Richard Sturgess**), Airedale NHS Trust (Dr **Chris Healey**), Barnsley Hospital NHS Foundation Trust (Dr **Kapil Kapur**), Ashford and St Peter's Hospitals NHS Trust (Dr **John Thornton**), Barking, Havering and Redbridge University Hospitals NHS Trust (Dr **Stephen Grainger**, Dr **Purushothaman Premchand**), Barnet and Chase Farm Hospitals NHS Trust (Dr **Stephen Mann**, Dr **Kalpesh Besherdas**), Barts and The London NHS Trust (Dr **Richard Marley**, Prof **Graham Foster**), Basingstoke and North Hampshire NHS Foundation Trust (Dr **John Ramage**), Bedford Hospital NHS Trust (Dr **Rory Harvey**), Blackpool Teaching Hospitals NHS Foundation Trust (Dr **Peter Isaacs**), Bolton NHS Foundation Trust (Dr **George Lipscomb**), Bradford Teaching Hospitals NHS Foundation Trust (Dr **Sulleman Moreea**), Brighton and Sussex University Hospitals NHS Trust (Dr **Jeremy Tibble**, Dr **Nick Parnell**), Bromley Hospitals NHS Trust (Dr **Anthony Jenkins**), Buckinghamshire Healthcare NHS Trust (Dr **Sue Cullen**, Dr **David Gorard**), Burton Hospitals NHS Foundation Trust (Dr **Altaf Palejwala**), Cambridge University Hospitals NHS Foundation Trust (Dr **George Mells**, Dr **Muhammad F Dawwas**), Calderdale And Huddersfield NHS Foundation Trust (Dr **Susan Jones**, Dr **Ashwin Verma**), Cardiff and Vale NHS Trust (Dr **Richard Aspinall**, Dr **Sunil Dolwani**), Central Manchester University Hospitals NHS Foundation Trust (Dr **Martin Prince**), Chelsea and Westminster Hospital NHS Foundation Trust (Dr **Karen Hawkins**, Dr **Priyajit Prasad**), Chesterfield Royal Hospitals NHS Foundation Trust (Dr **David Elphick**), City Hospitals Sunderland NHS Foundation Trust (Dr **Harriet Mitchison**), Colchester Hospital University NHS Foundation Trust (Dr **Ian Gooding**), Countess of Chester Hospital NHS Foundation Trust (Dr **Mazn Karmo**), County Durham and Darlington NHS Foundation Trust (Dr **Anjan Dhar**, Dr **Stephen Mitchell**, Dr **Sushma Saksena**), Cwm Taf NHS Trust (Dr **Minesh Patel**), Dartford And Gravesham NHS Trust (Dr **Roland Ede**), Derby Hospitals NHS Foundation Trust (Dr **Andrew Austin**), Doncaster and Bassetlaw Hospitals NHS Foundation Trust (Dr **Joanne Sayer**), Dorset County Hospitals NHS Foundation Trust (Dr **Chris Hovell**), East and North Hertfordshire NHS Trust (Dr **Martyn Carter**, Dr **Peter McIntyre**), East Cheshire NHS Trust (Dr **Konrad Koss**), Medway NHS Foundation Trust (Dr **Gray Smith-Laing**), Maidstone and Tunbridge Wells NHS Trust (Dr **George Bird**), East Kent Hospitals University NHS Foundation Trust (Dr **Kate Hill**), East Sussex NHS Trust (Dr **David Neal**), East Lancashire Hospitals NHS Trust (Dr **Vishal Kaushik**), Epsom and St Helier University Hospitals NHS Trust (Dr **Guan Lim**), Frimley Par NHS Foundation Trust (Dr **Aftab Ala**), Gateshead Health NHS Foundation Trust (Dr **Athar Saeed**), George Eliot Hospital NHS Trust (Dr **Sankara Raman**), Gloucestershire Hospitals NHS Foundation Trust (Professor **Jonathan Brown**), Great Western Hospitals NHS Foundation Trust (Dr **Ajeya Shetty**), Guy's and St Thomas' NHS Trust (Dr **Mark Wilkinson**), Gwent Healthcare NHS Trust (Dr **Miles Allison**, Dr **Marek Czajkowi**, Dr **Peter Neville**), Harrogate and District NHS Foundation Trust (Dr **Butt**, Dr **Gareth Davies**), Heart of England NHS Foundation Trust (Dr **Theodore Ngatchu**), Hereford Hospitals NHS Trust (Dr **Rupert Ransford**), Hinchingsbrooke Health Care NHS Trust (Dr **Richard Dickinson**), Homerton University Hospital NHS Foundation Trust (Dr **Ray Shidrawi**), Hull And East Yorkshire Hospitals NHS Trust (Dr **George Abouda**), Hywel Dda Health Board NHS Trust (Dr **Faiz Ali**, Dr **Mark Narain**, Dr **Ian Rees**, Dr **Imroz Salam**), Imperial College Healthcare NHS Trust (Dr **Ashley Brown**), Ipswich Hospital NHS Trust (Dr **Simon Williams**), NHS Isle Of Wight (Dr **Christopher Sheen**), James Paget University Hospitals NHS Foundation Trust (Dr **Matthew Williams**), Kings College Hospital NHS Foundation Trust (Dr **Michael Heneghan**), Kingston Hospital NHS Trust (Dr **Chris Rodrigues**), Lancashire Teaching Hospitals NHS Foundation Trust (Dr **Phillip Shields**), Leeds Teaching Hospitals NHS Trust (Dr **Mark Aldersley**, Dr **Mervyn Davies**, Dr **Charles Millson**), Luton and Dunstable Hospital NHS Foundation Trust (Dr **Sambit Sen**), Mid Cheshire Hospitals NHS Foundation Trust (Dr **Kevin Yoong**), Mid Essex Hospital Services NHS Trust (Dr **Cho Cho Khin**), Mid Staffordshire NHS Foundation Trust (Dr **Pradip Singh**), Mid Yorkshire Hospitals NHS Trust (Dr **Nurani Sivaramakrishnan**), Milton Keynes Hospital NHS Foundation Trust (Dr **George MacFaul**), Newham University Hospital NHS Trust (Dr **Matthew Guinane**), NHS Ayrshire & Arran (Dr **Chris Gillen**, Dr **James Rose**, Dr **Amir Shah**), NHS Borders (Dr **Chris Evans**), NHS Dumfries & Galloway (Dr **Subrata Saha**), NHS Fife (Dr **Sherzad Balta**, Dr **John Wilson**), NHS Forth Valley (Dr **Peter Bramley**), NHS Grampian (Dr **Andrew Fraser**), NHS Greater Glasgow and Clyde (Dr **Aidan Cahill**, Dr **G Curry**, Dr **Shouren Datta**, Dr **Ewan Forrest**, Dr **Neil Jamieson**, Dr **James McPeake**, Professor **Peter Mills**, Dr **Judith Morris**, Dr **Adrian Stanley**), NHS Highland (Dr **Dara De Las Heras**, Dr **Tim Shallcross**), NHS Lanarkshire (Dr **Stuart Campbell**, Dr **Richard Crofton**, Dr **Andrzej Prach**), NHS Lothian (Dr **Andrew Bathgate**, Dr **Kevin Palmer**), NHS Tayside (Dr **Alan Shepard**, Dr **John Dillon**), Norfolk and Norwich University Hospitals NHS Foundation Trust (Dr **Martin Phillips**), North Bristol NHS Trust (Dr **Robert Przemioslo**), North Cumbria University Hospitals NHS Trust (Dr **Babur Javaid**, Dr **Chris McDonald**), North Tees And Hartlepool NHS Foundation Trust (Dr **Jane Metcalf**), North Wales NHS Trust (Dr **Paulose George**, Dr **David Ramanaden**), The North West London Hospitals NHS Trust (Dr **Maxton Pitcher**), North West Wales NHS Trust (Dr **Jaber Gasem**, Dr **Richard Evans**), Northampton General Hospital NHS Trust (Dr **Udi Shmueli**), Northern Devon Healthcare NHS Trust (Dr **Andrew Davis**), Northern Lincolnshire and Goole Hospitals NHS Foundation Trust (Dr **Prabhakar Mysore**, Dr **Asifabbas Naqvi**), Northumbria Healthcare NHS Trust (Dr **Mark Welfare**), Nottingham University Hospitals NHS Trust (Dr **Steve Ryder**), Pennine Acute Hospitals NHS Trust (Dr **Howard Klass**, Dr **Jimmy**

**Limdi, Dr Bashir Rameh**), Peterborough Stamford Hospitals NHS Foundation Trust (Dr **Mary Ninkovic**), Plymouth Hospitals NHS Trust (Dr **Matthew Cramp**), Poole Hospital NHS Foundation Trust (Dr **Nicholas Sharer**), Portsmouth Hospitals NHS Trust (Dr **Patrick Goggin**), Queen Mary's Sidcup NHS Trust (Dr **Howard Curtis**), Royal Berkshire NHS Foundation Trust (Dr **Jonathan Booth**), Royal Cornwall Hospitals NHS Trust (Dr **Hyder Hussaini**), Royal Devon and Exeter NHS Foundation Trust (Dr **Reuben Ayres**), Royal Free Hampstead NHS Trust (Dr **Douglas Thorburn**), Royal Liverpool and Broadgreen University Hospitals NHS Trust (Dr **Martin Lombard**), Royal Surrey County Hospital NHS Trust (Dr **Michelle Gallagher**), Royal United Hospital Bath NHS Trust (Dr **Duncan Robertson**), Salisbury NHS Foundation Trust (Dr **Sam Vyas**), Sandwell and West Birmingham Hospitals NHS Trust (Dr **Saket Singhal**), Scarborough And North East Yorkshire Health Care NHS Trust (Dr **Sathish Babu**), Sheffield Teaching Hospitals NHS Foundation Trust (Dr **Dermot Gleeson**), Sherwood Forest Hospitals NHS Foundation Trust (Dr **Sharat Misra**), Shrewsbury and Telford Hospital NHS Trust (Dr **Jeff Butterworth**), South Devon Healthcare NHS Trust (Dr **Keith George**), South London Healthcare NHS Trust (Dr **Alastair McNair**), South Tees Hospitals NHS Trust (Dr **Andrew Douglas**), South Tyneside NHS Foundation Trust (Dr **Colin Rees**), South Warwickshire General Hospitals NHS Trust (Dr **Jeremy Shearman**), Southampton University Hospitals NHS Trust (Dr **Kate Nash, Dr Mark Wright**), Southend University Hospital NHS Foundation Trust (Dr **Gary Bray**), Southport And Ormskirk Hospital NHS Trust (Dr **Graham Butcher**), St George's Healthcare NHS Trust (Dr **Daniel Forton**), St Helens And Knowsley Hospitals NHS Trust (Dr **John McLindon**), Stockport NHS Foundation Trust (Dr **Debashis Das**), Surrey and Sussex Healthcare NHS Trust (Dr **Gary Mackenzie, Dr Azhar Ansari, Dr Gregory Whatley**), Taunton and Somerset NHS Foundation Trust (Dr **Stirling Pugh**), Dudley Group of Hospitals NHS Trust (Dr **Neil Fisher**), The Hillingdon Hospital NHS Trust (Dr **Deb Datta**), The Lewisham Hospital NHS Trust (Dr **John Odonohue**), The Newcastle upon Tyne Hospitals NHS Foundation Trust (Dr **Mark Hudson**), The Princess Alexandra Hospital NHS Trust (Dr **Rosemary Phillips**), The Queen Elizabeth Hospital King's Lynn NHS Trust (Dr **Andrew Douds**), Rotherham NHS Foundation Trust (Dr **Barbara Hoeroldt**), Royal Bournemouth And Christchurch Hospitals NHS Foundation Trust (Dr **Earl Williams**), The Royal Wolverhampton Hospitals NHS Trust (Dr **Matthew Brookes**), Trafford Healthcare NHS Trust (Dr **Chris Summerton**), United Lincolnshire Hospitals NHS Trust (Dr **Aravamuthan Sreedharan, Dr Sanjiv Jain, Dr Martin James**), University College London Hospitals NHS Foundation Trust (Dr **Stephen Pereira**), University Hospital Birmingham NHS Foundation Trust (Professor **David Adams**), University Hospital of North Staffordshire NHS Trust (Dr **Alison Brind**), University Hospital of South Manchester NHS Foundation Trust (Dr **Gill Watt**), University Hospitals Bristol NHS Foundation Trust (Dr **Fiona Gordon, Dr Jim Portal**), University Hospitals Coventry and Warwickshire NHS Trust (Dr **Esther Unitt**), University Hospitals of Leicester NHS Trust (Dr **Allister Grant**), Walsall Hospitals NHS Trust (Dr **Mark Cox**), Warrington and Halton Hospitals NHS Foundation Trust (Dr **Subramaniam Ramakrishnan**), West Hertfordshire Hospitals NHS Trust (Dr **Alistair King**), West Suffolk Hospitals NHS Trust (Dr **Simon Whalley**), Western Sussex Hospitals NHS Trust (Dr **Andy Li, Dr Mohammed Rashid**), Weston Area Health NHS Trust (Dr **Andrew Bell**), Winchester And Eastleigh Healthcare NHS Trust (Dr **Harriet Gordon**), Wirral University Teaching Hospital NHS Foundation Trust (Dr **Riyaz Faizallah**), Worcestershire Acute Hospitals NHS Trust (Dr **Ishfaq Ahmad, Dr Ian Gee**), Wrightington, Wigan and Leigh NHS Trust (Dr **Gurvinder Banait**), Yeovil District Hospital NHS Foundation Trust (Dr **Steve Gore, Dr James Gotto**), York Hospitals NHS Foundation Trust (Dr **Alastair Turnbull**).
